# Supplementary material for: Qubits made by advanced semiconductor manufacturing
Source: Springer Nature journal article supplement (doi:10.1038/s41928-022-00727-9), 2022-03-29
Supplement: 41928_2022_727_MOESM1_ESM.pdf [file 41928_2022_727_MOESM1_ESM.pdf]

**Supplementary information**

---

**Qubits made by advanced semiconductor manufacturing**

---

In the format provided by the authors and unedited

**Supplementary information**

---

**Qubits made by advanced semiconductor manufacturing**

---

In the format provided by the authors and unedited

## Supplementary Information - Qubits made by advanced semiconductor manufacturing

A.M.J. Zwerver<sup>1</sup>, T. Krähenmann<sup>1</sup>, T.F. Watson<sup>2</sup>, L. Lampert<sup>2</sup>, H.C. George<sup>2</sup>, R. Pillarisetty<sup>2</sup>, S.A. Bojarski<sup>2</sup>, P. Amin<sup>2</sup>, S.V. Amitonov<sup>1</sup>, J.M. Boter<sup>1</sup>, R. Caudillo<sup>2</sup>, D. Corras-Serrano<sup>2</sup>, J.P. Dehollain<sup>1</sup>, G. Droulers<sup>1</sup>, E.M. Henry<sup>2</sup>, R. Kotlyar<sup>2</sup>, M. Lodari<sup>1</sup>, F. Luthi<sup>2</sup>, D.J. Michalak<sup>2</sup>, B.K. Mueller<sup>2</sup>, S. Neyens<sup>2</sup>, J. Roberts<sup>2</sup>, N. Samkharadze<sup>1</sup>, G. Zheng<sup>1</sup>, O.K. Zietz<sup>2</sup>, G. Scappucci<sup>1</sup>, M. Veldhorst<sup>1</sup>, L.M.K. Vandersypen<sup>1,\*</sup>, J.S. Clarke<sup>2,\*</sup>

<sup>1</sup> *QuTech and Kavli Institute of Nanoscience, Delft University of Technology, 2600 GA Delft, The Netherlands*

<sup>2</sup> *Intel Components Research, Intel Corporation, 2501 NW 229th Avenue, Hillsboro, OR, USA*

\* Corresponding authors: l.m.k.vandersypen@tudelft.nl; james.s.clarke@intel.com

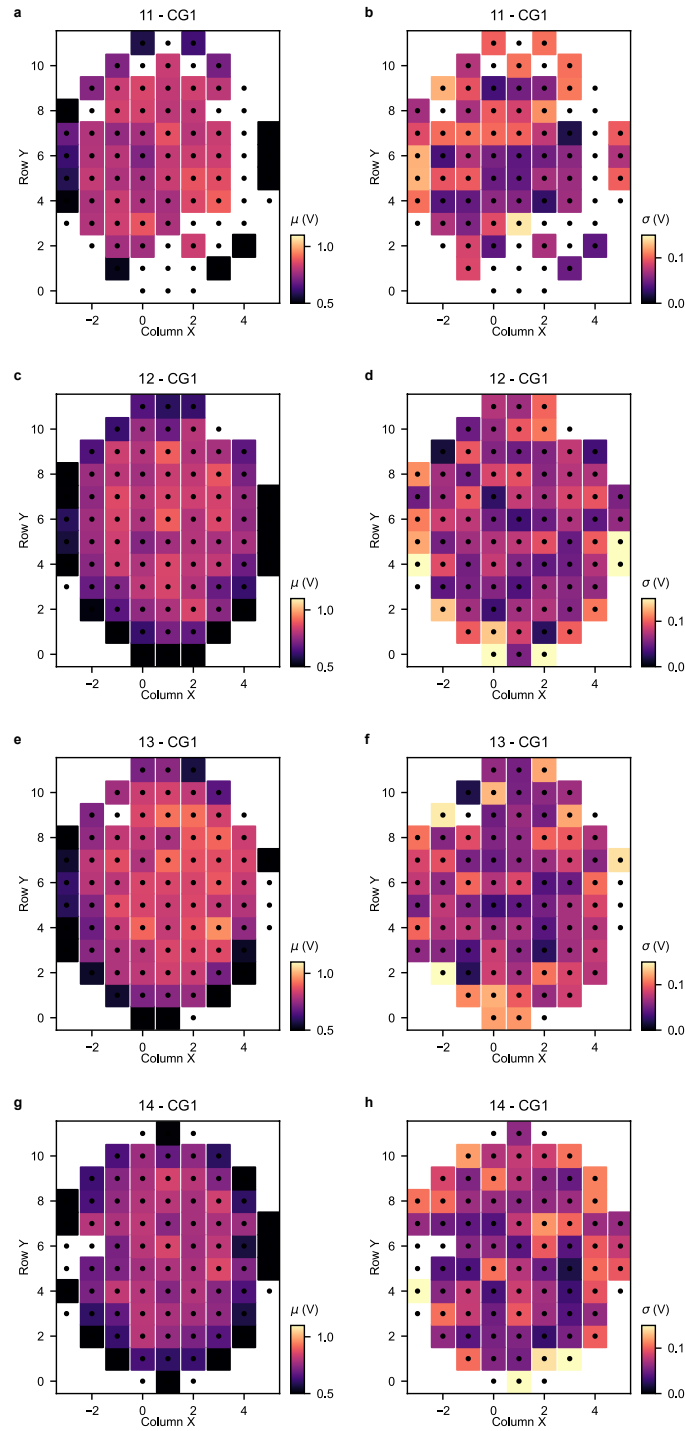

SUPPLEMENTARY FIG. 1. **Cross-wafer variation of threshold voltages of the first gate layer at room temperature.** For each yielding device on the almost identical wafers 11, 12, 13 and 14, the threshold voltage for the seven gates on both fins is analysed. Each device has two gate layers. Gate layer 1 contains gates G2, G4 and G6 and gate layer 2 contains gates G1, G3, G5 and G7. **a, c, e, g,** Mean threshold voltage per device of the three gates of the first gate layer (even-numbered) for the yielding devices on wafer 11 (**a**), 12 (**c**), 13 (**e**) and 14 (**g**). The samples at the edge of the wafer consistently have a lower threshold voltage than the samples at the center of the wafer. **b, d, f, h,** Standard deviation of the threshold voltages per device of the first gate layer for the yielding devices on wafer 11, 12, 13 and 14. Apart from a few outliers, the standard deviation of the threshold voltage per sample is always below 145 mV.

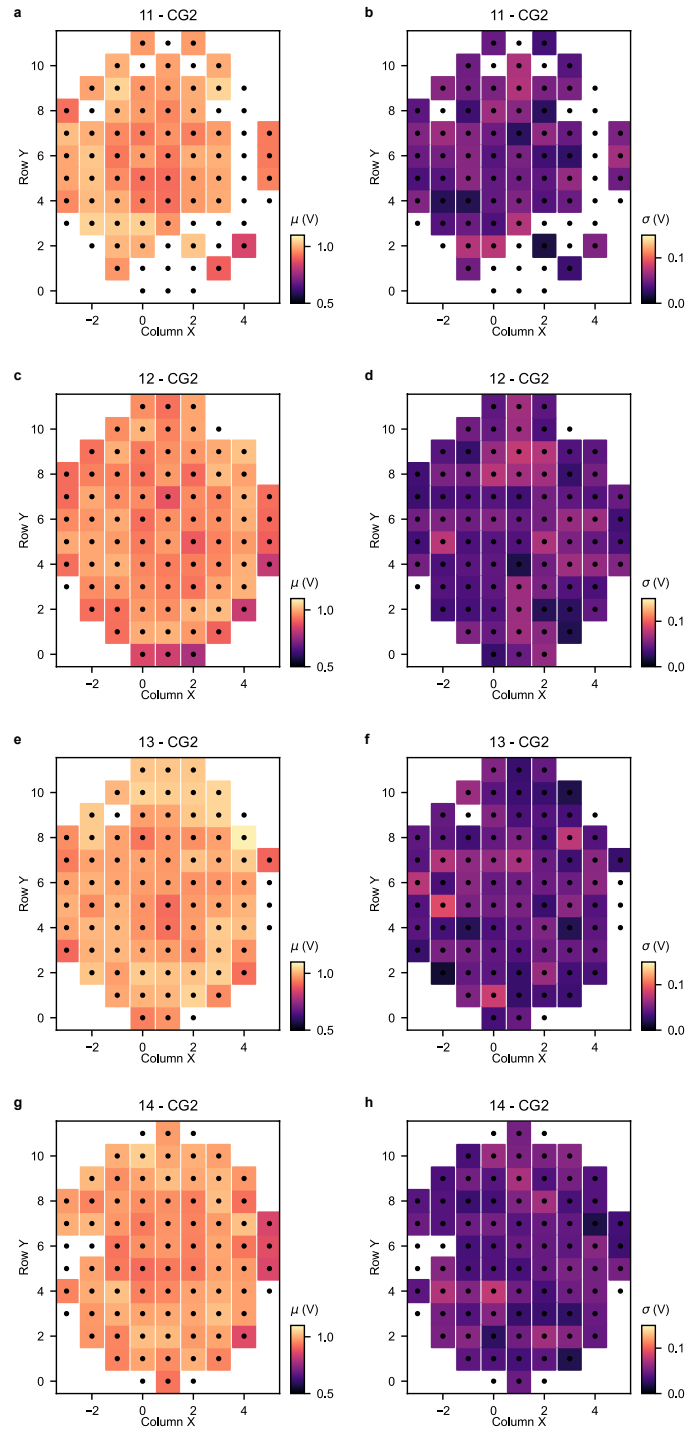

SUPPLEMENTARY FIG. 2. **Cross-wafer variation of threshold voltages of the second gate layer at room temperature.** For each yielding device on the almost identical wafers 11, 12, 13 and 14, the threshold voltage for the seven gates on both fins is analysed. Each device has two gate layers. Gate layer 1 contains gates G2, G4 and G6 and gate layer 2 contains gates G1, G3, G5 and G7. **a, c, e, g,** Mean threshold voltage per device of the four gates of the second gate layer (odd-numbered) for the yielding devices on wafer 11 (**a**), 12 (**c**), 13 (**e**) and 14 (**g**). **b, d, f, h,** Standard deviation of the threshold voltages per device of the second gate layer for the yielding devices on wafer 11, 12, 13 and 14. Apart from a few outliers, the standard deviation of the threshold voltage per sample is always below 70 mV.

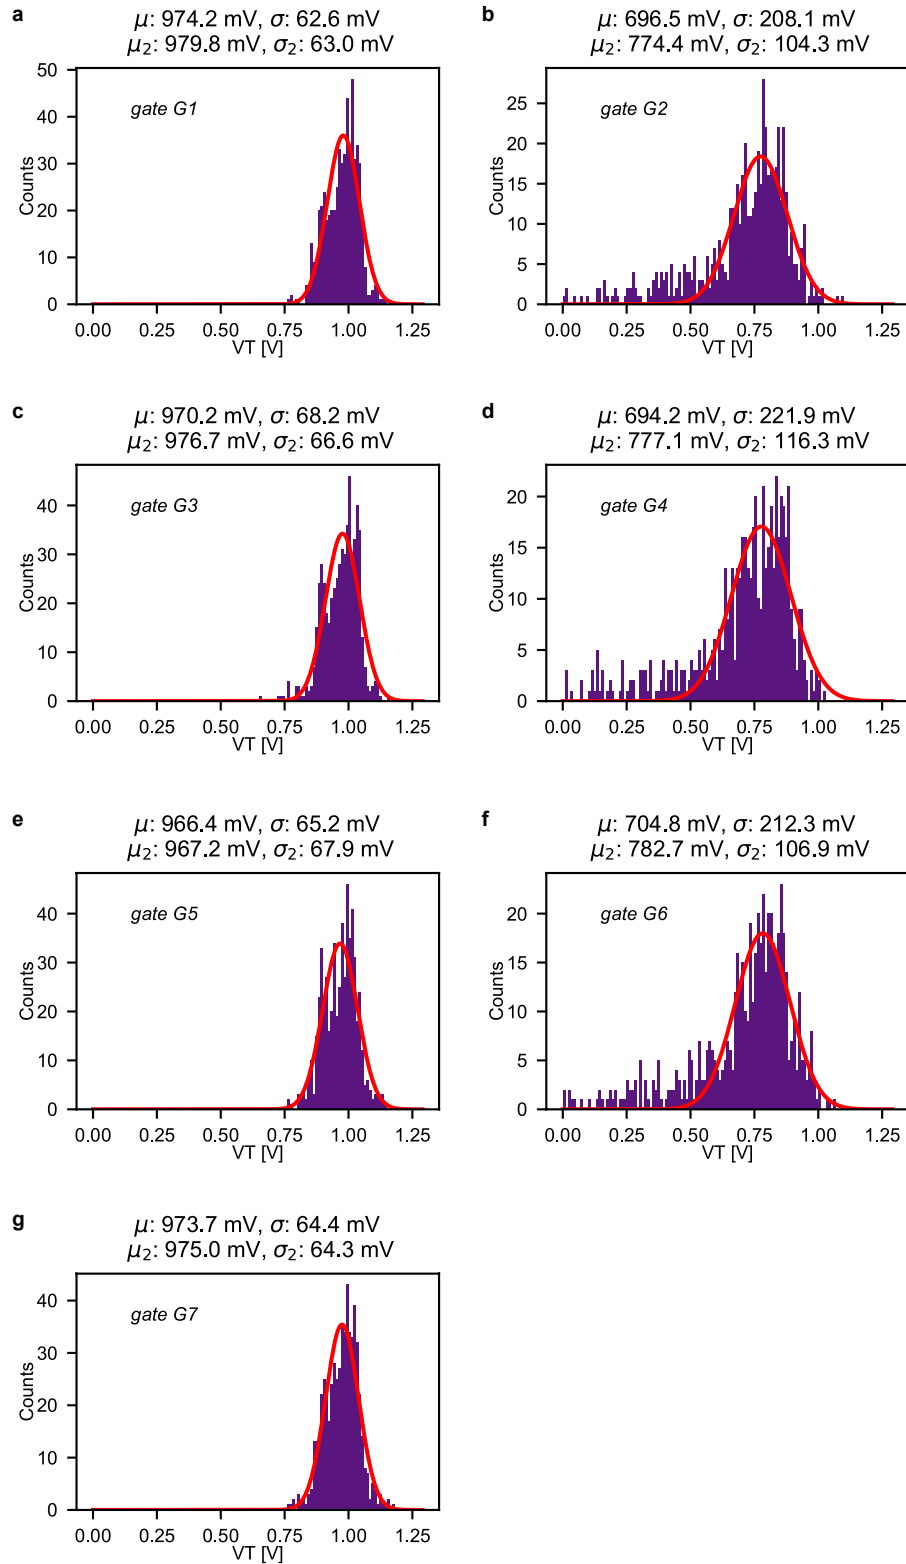

SUPPLEMENTARY FIG. 3. **Histograms of threshold voltage per gate at room temperature.** Histograms for the threshold voltage per gate (G1-G7) for all yielding samples on wafers 11-14. We see that the gates on gate layer 1, G2 (b), G4 (d) and G6 (f) have a wider spread in threshold voltage than the gates from gate layer 2 G1 (a), G3 (c), G5 (e) and G7 (g). This is mainly caused by the fact that the samples around the edges of the wafers consistently show significantly lower threshold voltages for the first gate layer than samples in the center of the wafer (see Extended Data Fig. 1). When we analyse each gate separately, we observe that the mean value and the standard deviation for all three gates in gate layer one is of similar order per gate, as are the mean and standard deviation for the four gates of gate layer 2. In addition to the mean and standard deviation of the individual threshold voltages, we provide above each panel in the second line the mean and the standard deviation of a Gaussian distribution fitted to the data (red line).

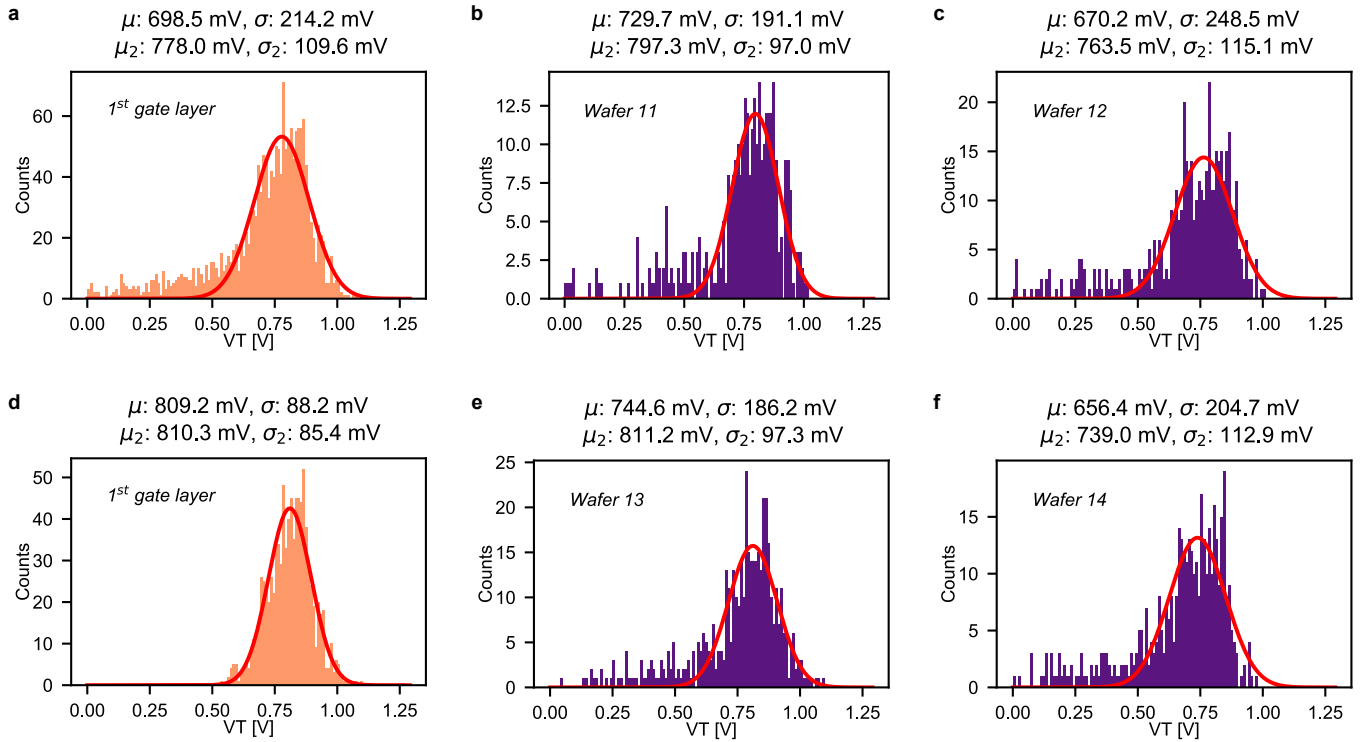

**SUPPLEMENTARY FIG. 4. Histograms of threshold voltage per wafer for the first gate layer at room temperature.** **a**, Histograms for the threshold voltage for all gates of the first gate layer of both fins for all yielding samples of wafers 11, 12, 13 and 14. **b**, **c**, **e**, **f** Histograms for the threshold voltage for all gates of the first gate layer of both fins for all yielding samples of wafer 11 (**b**), 12 (**c**), 13 (**e**), and 14 (**f**). **d**, Histograms for the threshold voltage for all gates of the first gate layer of both fins for all yielding samples of wafers 11, 12, 13 and 14, while not taking into account the samples at the edge. We see that when only taking into account the samples at the center of the four wafers, the standard deviation approaches that for the second gate layer (Extended Data Fig 5), where this edge-effect is not apparent. The average threshold voltage is a bit lower for the first gate layer than for the second gate layer. This can be explained by the extra oxide layer between the second gate layer and the sample. In addition to the mean and standard deviation determined by the individual threshold voltages, we provide above each panel in the second line the mean and the standard deviation of a Gaussian distribution fitted to the data (red line).

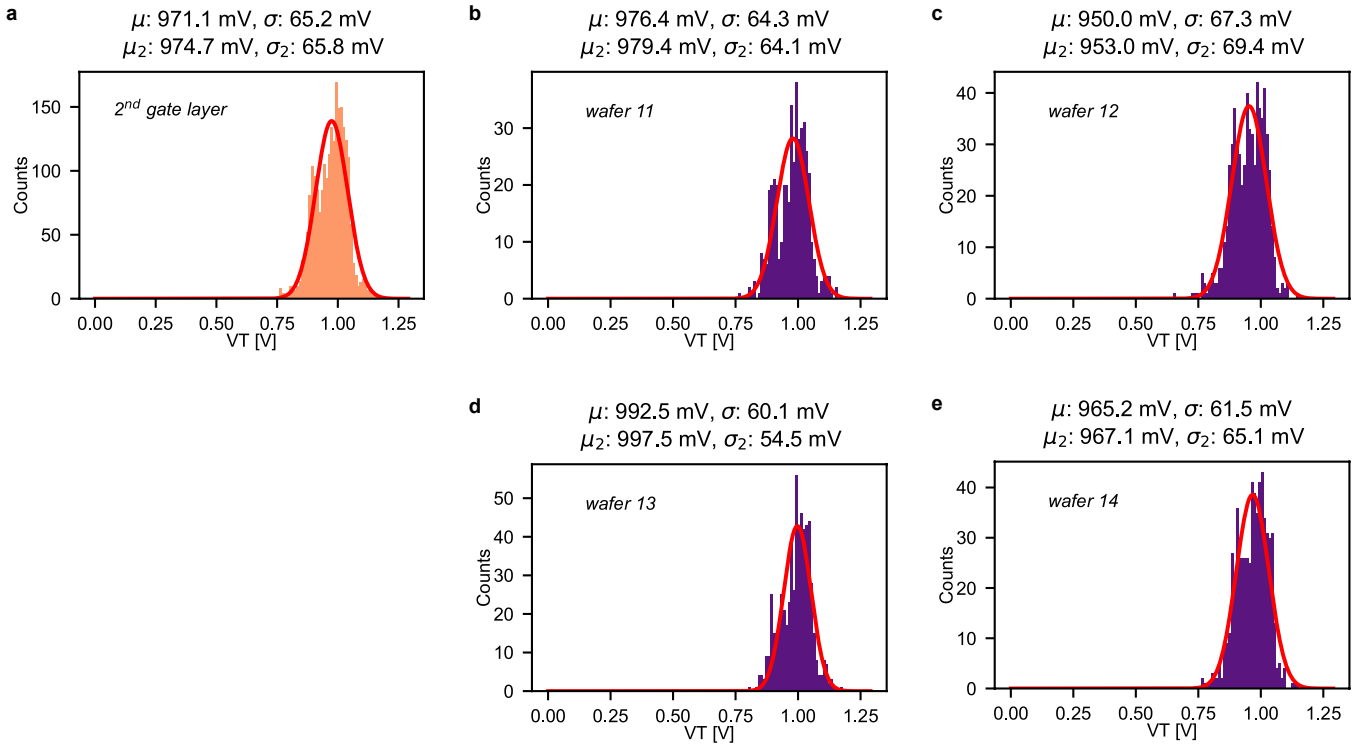

SUPPLEMENTARY FIG. 5. **Histograms of threshold voltage per wafer for the second gate layer at room temperature.** **a**, Histograms for the threshold voltage for all gates of the second gate layer of both fins for all yielding samples of wafers 11, 12, 13 and 14. **b**, **c**, **d**, **e** Histograms for the threshold voltage for all gates of the second gate layer of both fins for all yielding samples of wafer 11 (**b**), 12 (**c**), 13 (**d**) and 14 (**e**). In addition to the mean and standard deviation of the individual threshold voltages, we provide above each panel in the second line the mean and the standard deviation of a Gaussian distribution fitted to the data (red line).



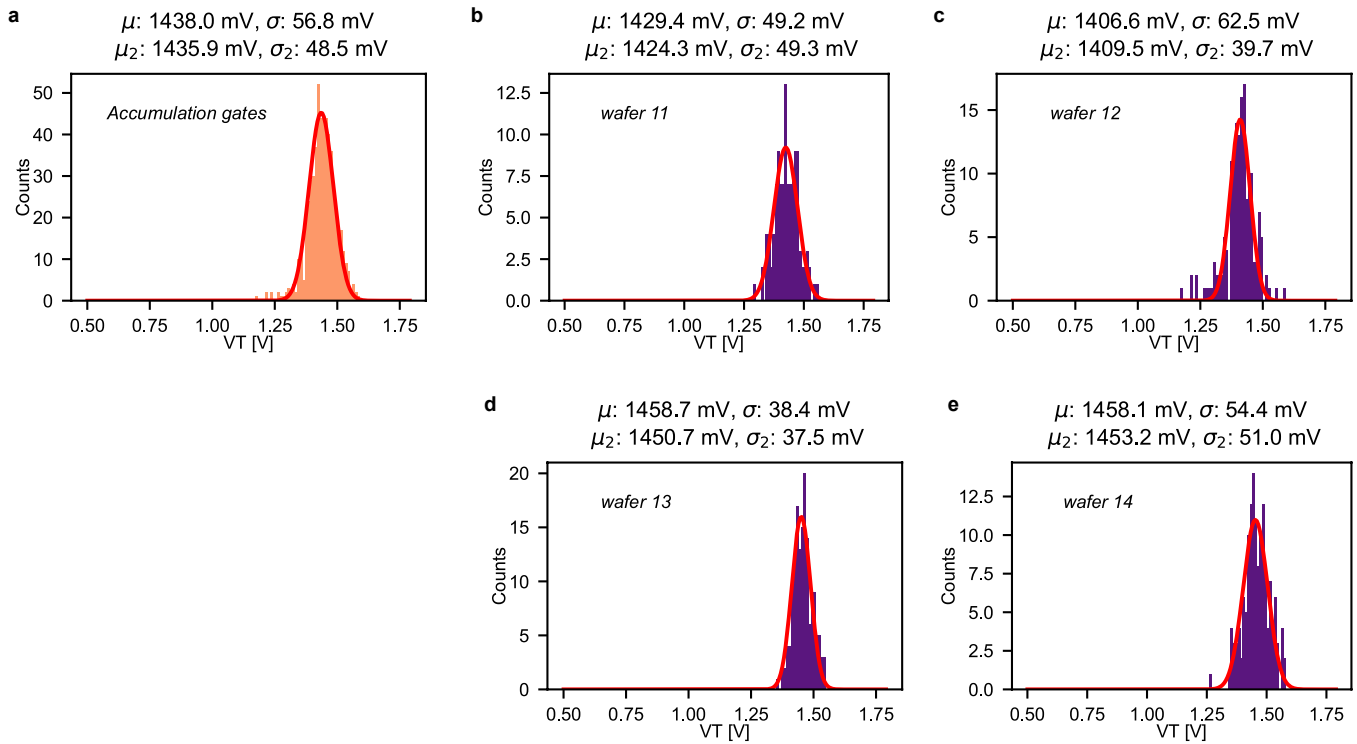

SUPPLEMENTARY FIG. 6. **Histograms of threshold voltage per wafer for the accumulation gates at room temperature.** **a**, Histograms for the threshold voltage for all accumulation gates of both fins for all yielding samples of wafers 11, 12, 13 and 14. **b**, **c**, **d**, **e**, Histograms for the threshold voltage for all accumulation gates of both fins for all yielding samples of wafer 11 (**b**), 12 (**c**), 13 (**d**) and 14 (**e**). The standard deviation of the accumulation gates per wafer is significantly smaller than the standard deviation of gate layer 1, the gate layer in which also the accumulation gates are fabricated. We expect this to be caused by the larger size of the accumulation gates compared to the finger gates in gate layer 1. The spread in threshold voltages for the accumulation gates is also smaller than the spread in threshold voltages of gate layer 2. In addition to the mean and standard deviation of the individual threshold voltages, we provide above each panel in the second line the mean and the standard deviation of a Gaussian distribution fitted to the data (red line).

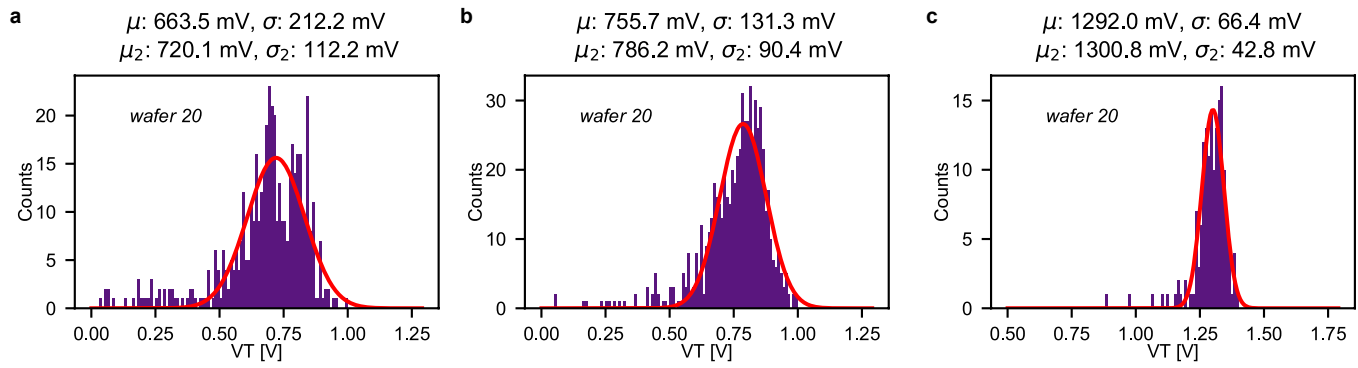

SUPPLEMENTARY FIG. 7. **Histograms of threshold voltage for the gates of wafer 20 at room temperature.** **a, b, c** Histograms for the threshold voltage for all gates of both fins for all yielding samples of gate layer 1 (**a**), gate layer 2 (**b**) and the accumulation gates (**c**) of wafer 20, the wafer containing the samples with the stripline.

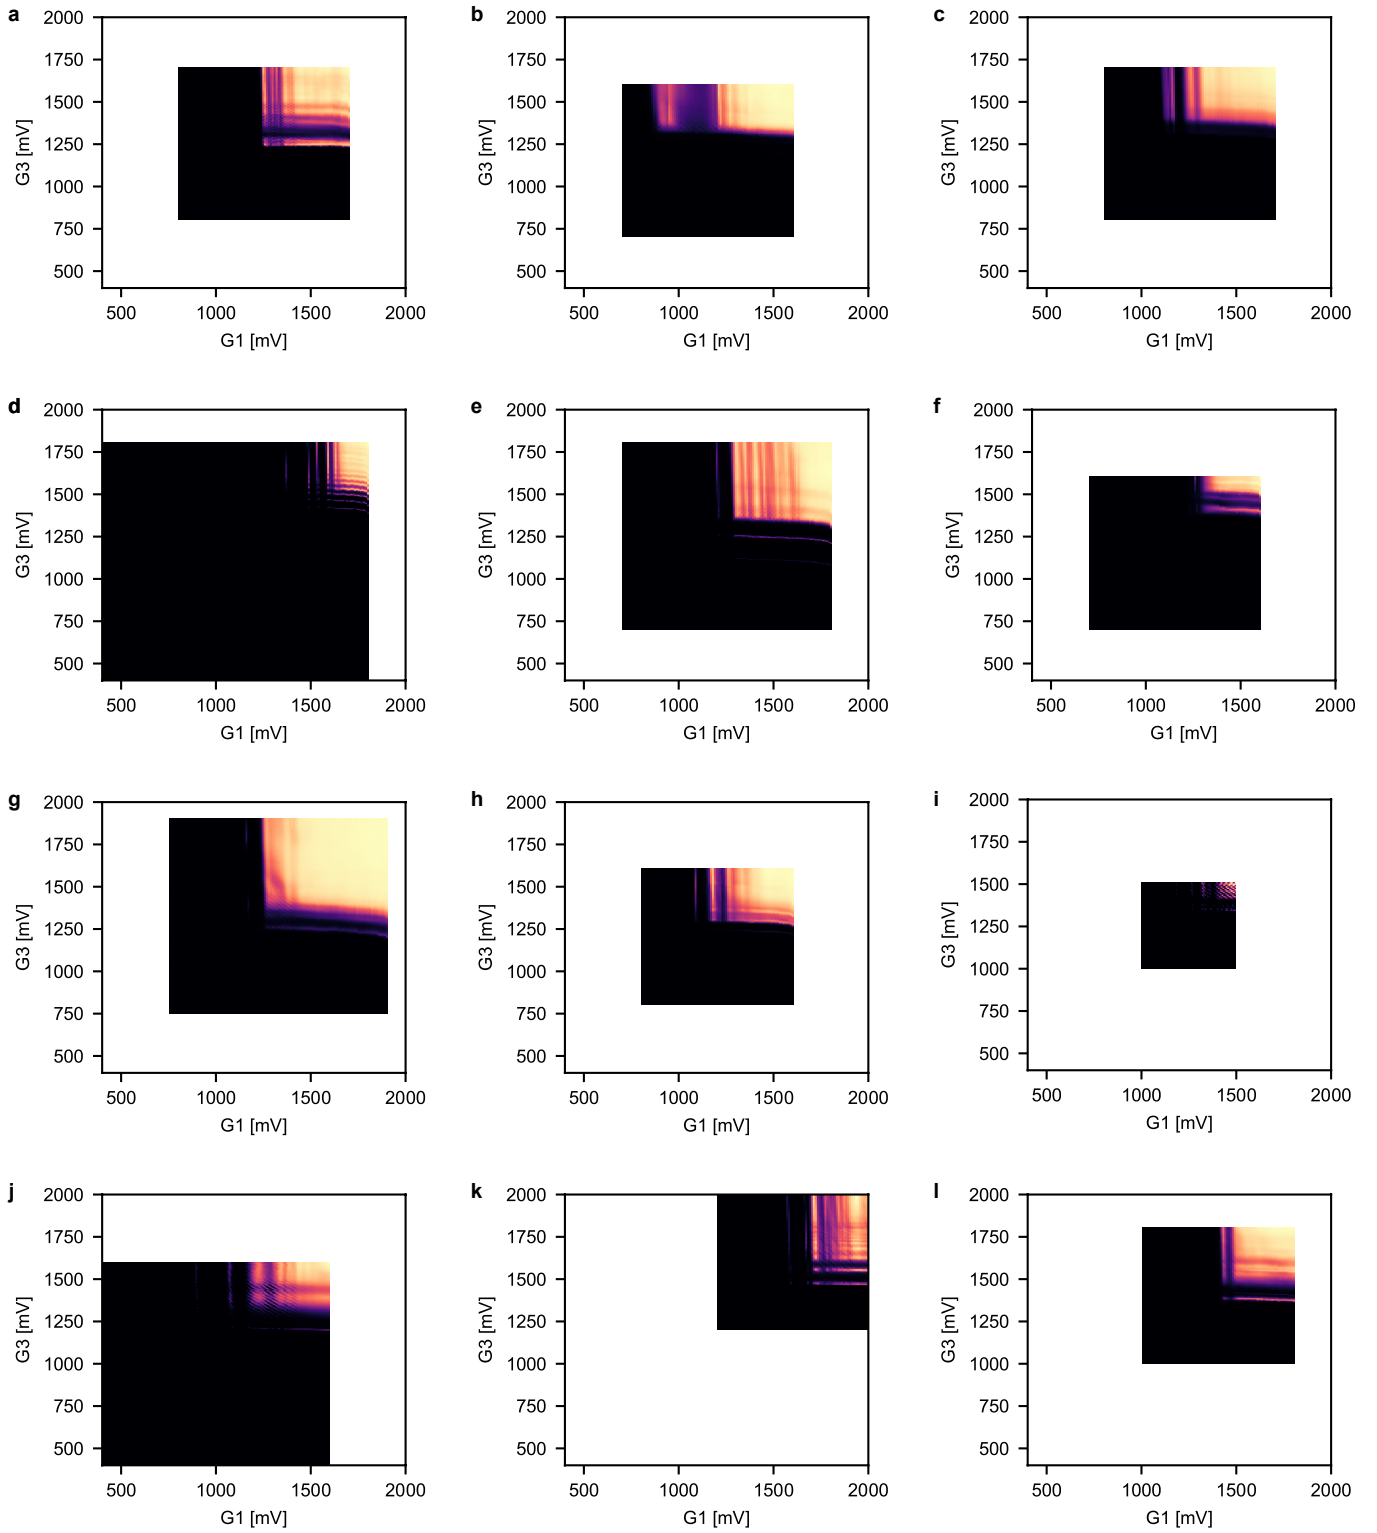

SUPPLEMENTARY FIG. 8. **Barrier-barrier maps for gates  $G1$ - $G3$ .** Barrier-barrier maps for a quantum dot under gate  $G2$  for 12 different samples, taken from yielding devices across wafers 11 (a-c), 12 (d-f), 13 (g-i) and 14 (j-l). For each sample, we are able to form a quantum dot.

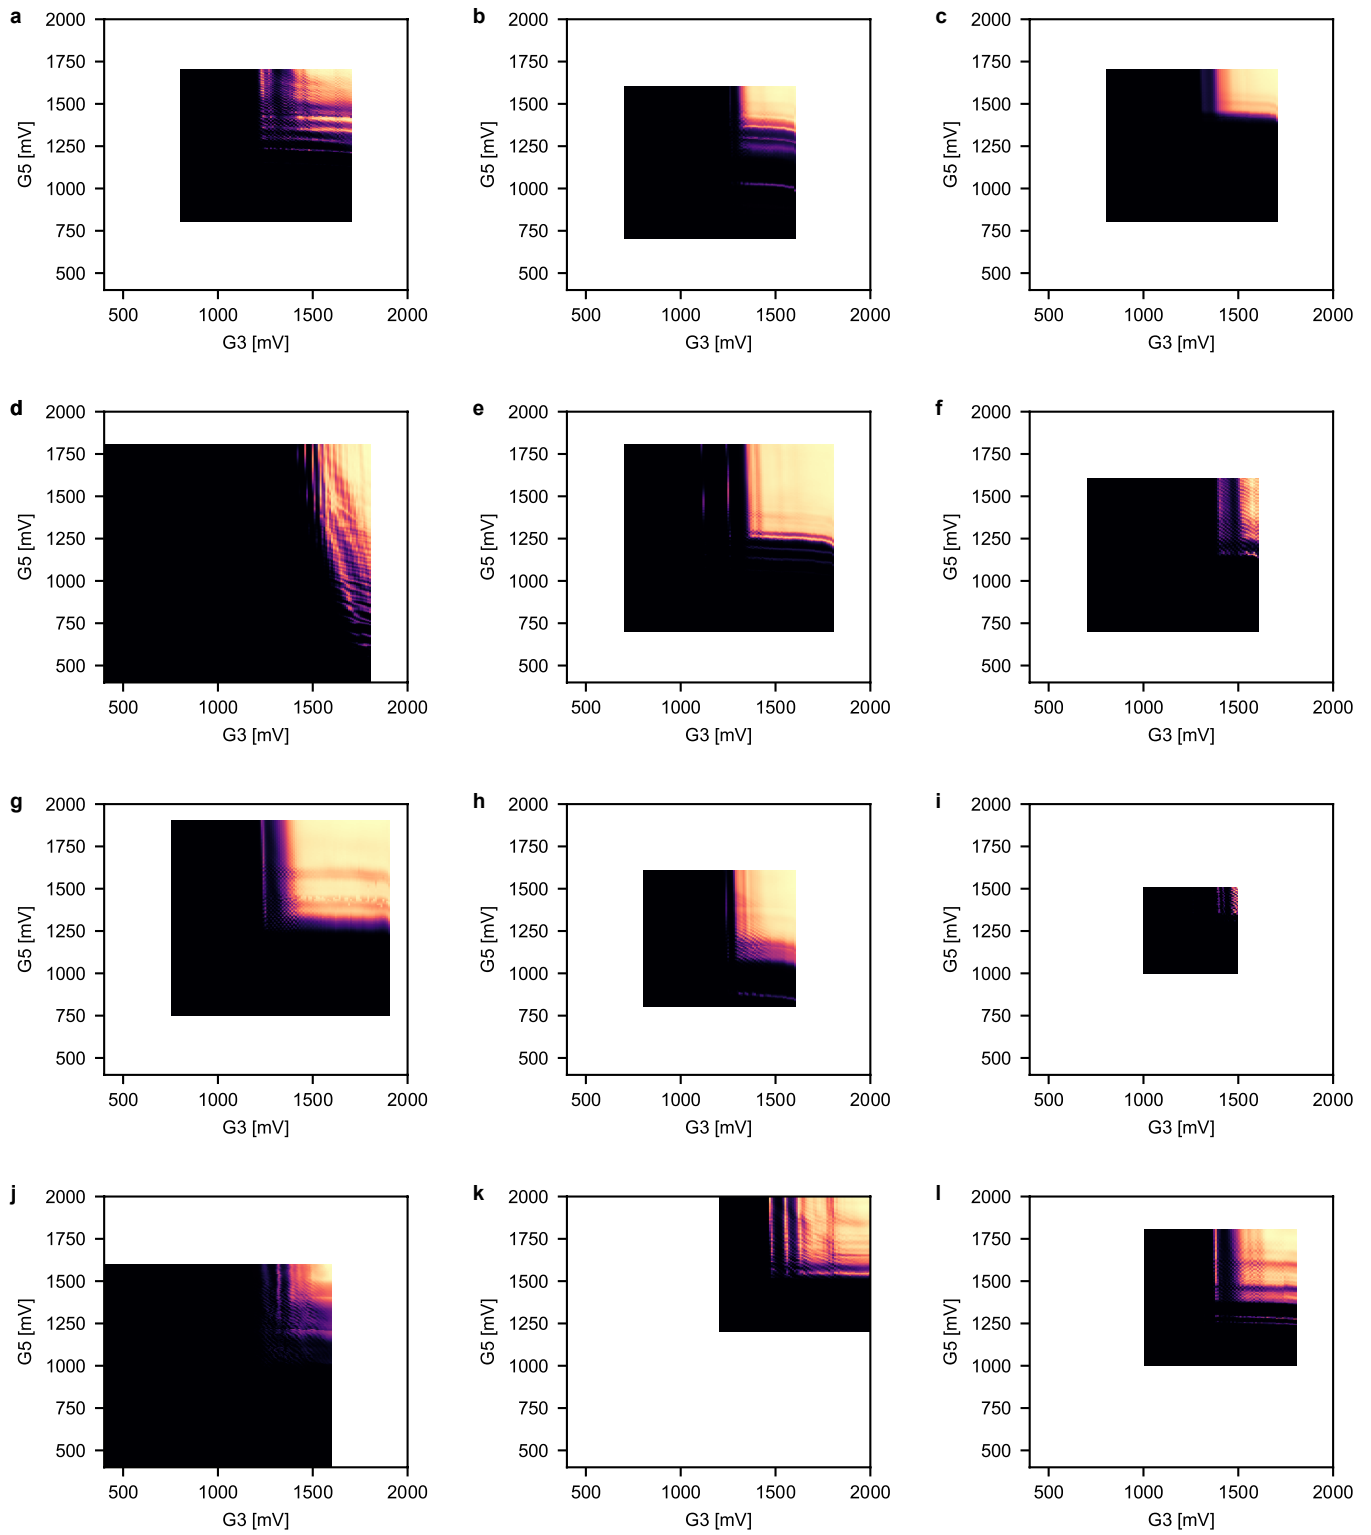

SUPPLEMENTARY FIG. 9. **Barrier-barrier maps for gates  $G3$ - $G5$ .** Barrier-barrier maps for a quantum dot under gate  $G4$  for 12 different samples, taken from yielding devices across wafers 11 (a-c), 12 (d-f), 13 (g-i) and 14 (j-l). For each sample, we are able to form a quantum dot.

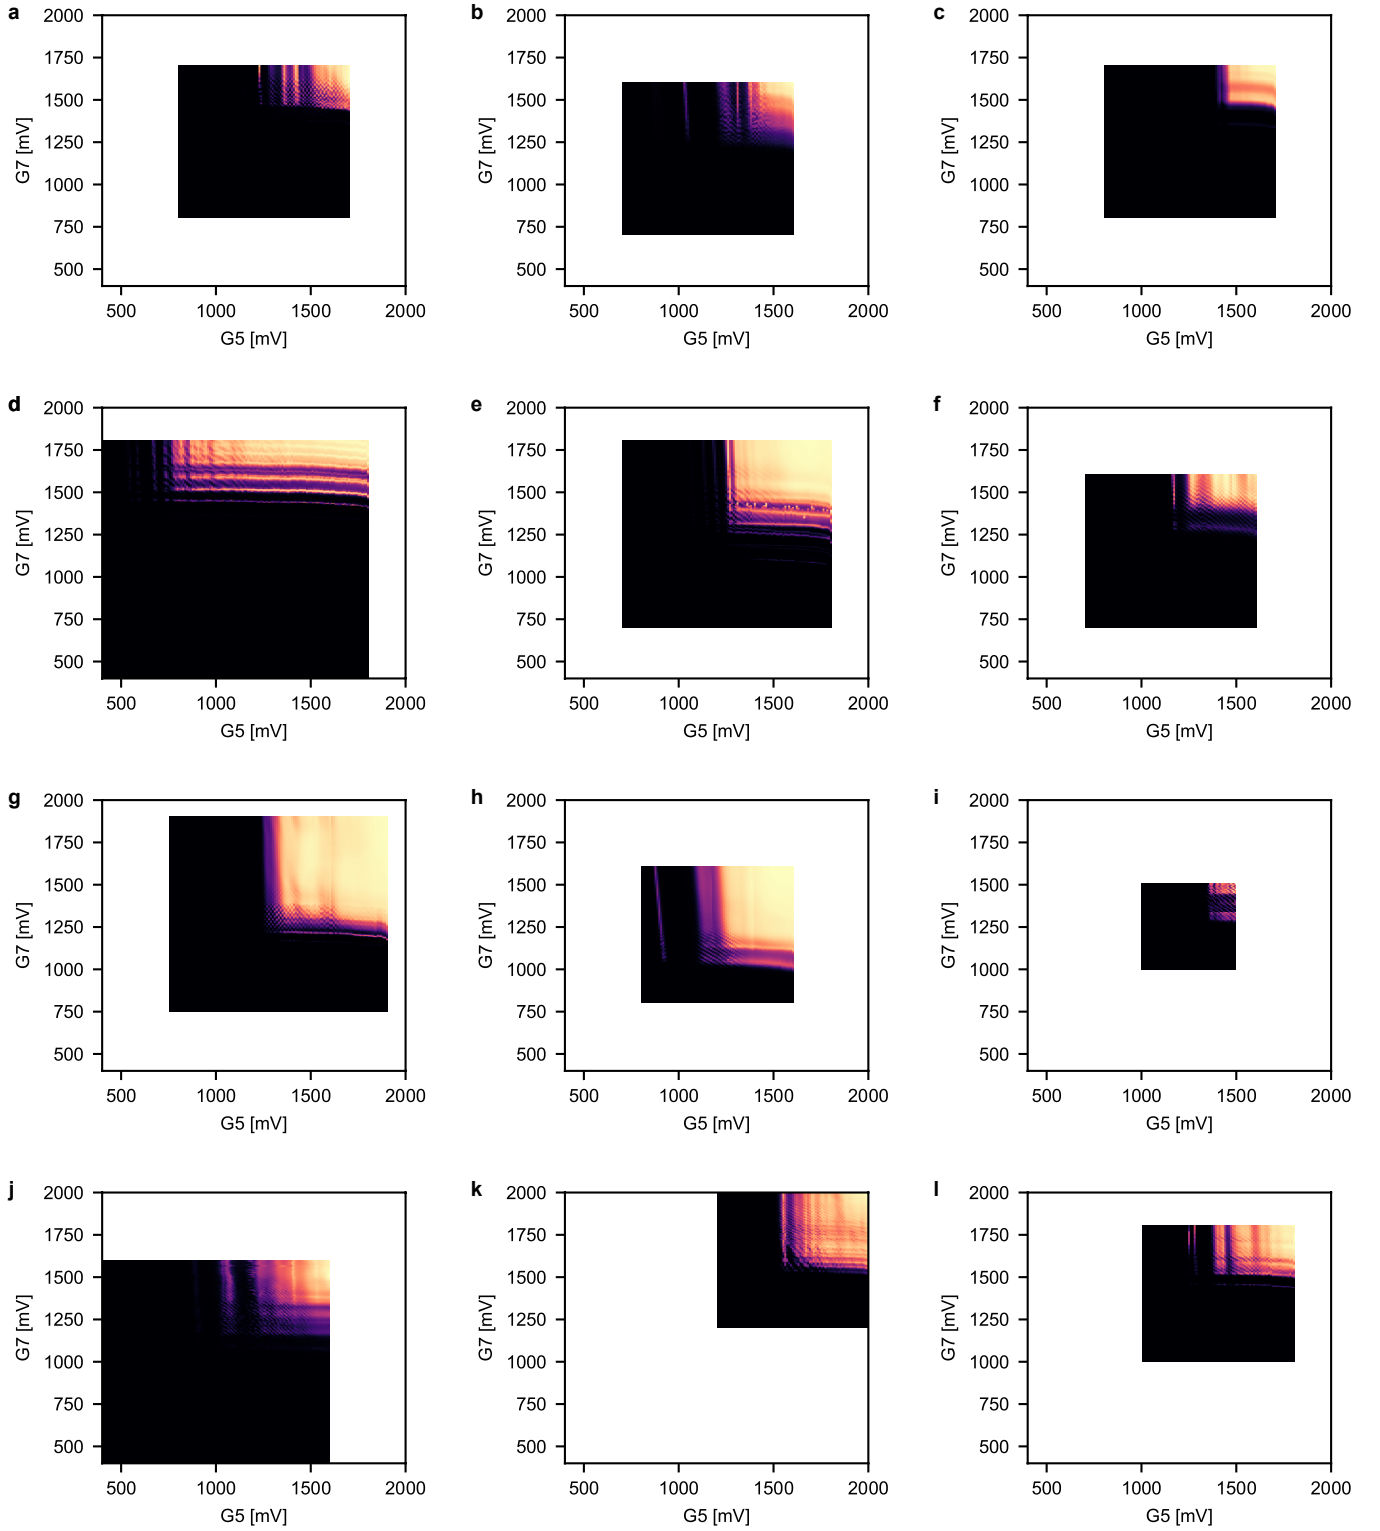

SUPPLEMENTARY FIG. 10. **Barrier-barrier maps for gates  $G5$ - $G7$ .** Barrier-barrier maps for a quantum dot under gate  $G6$  for 12 different samples, taken from yielding devices across wafers 11 (a-c), 12 (d-f), 13 (g-i) and 14 (j-l). For each sample, we are able to form a quantum dot.

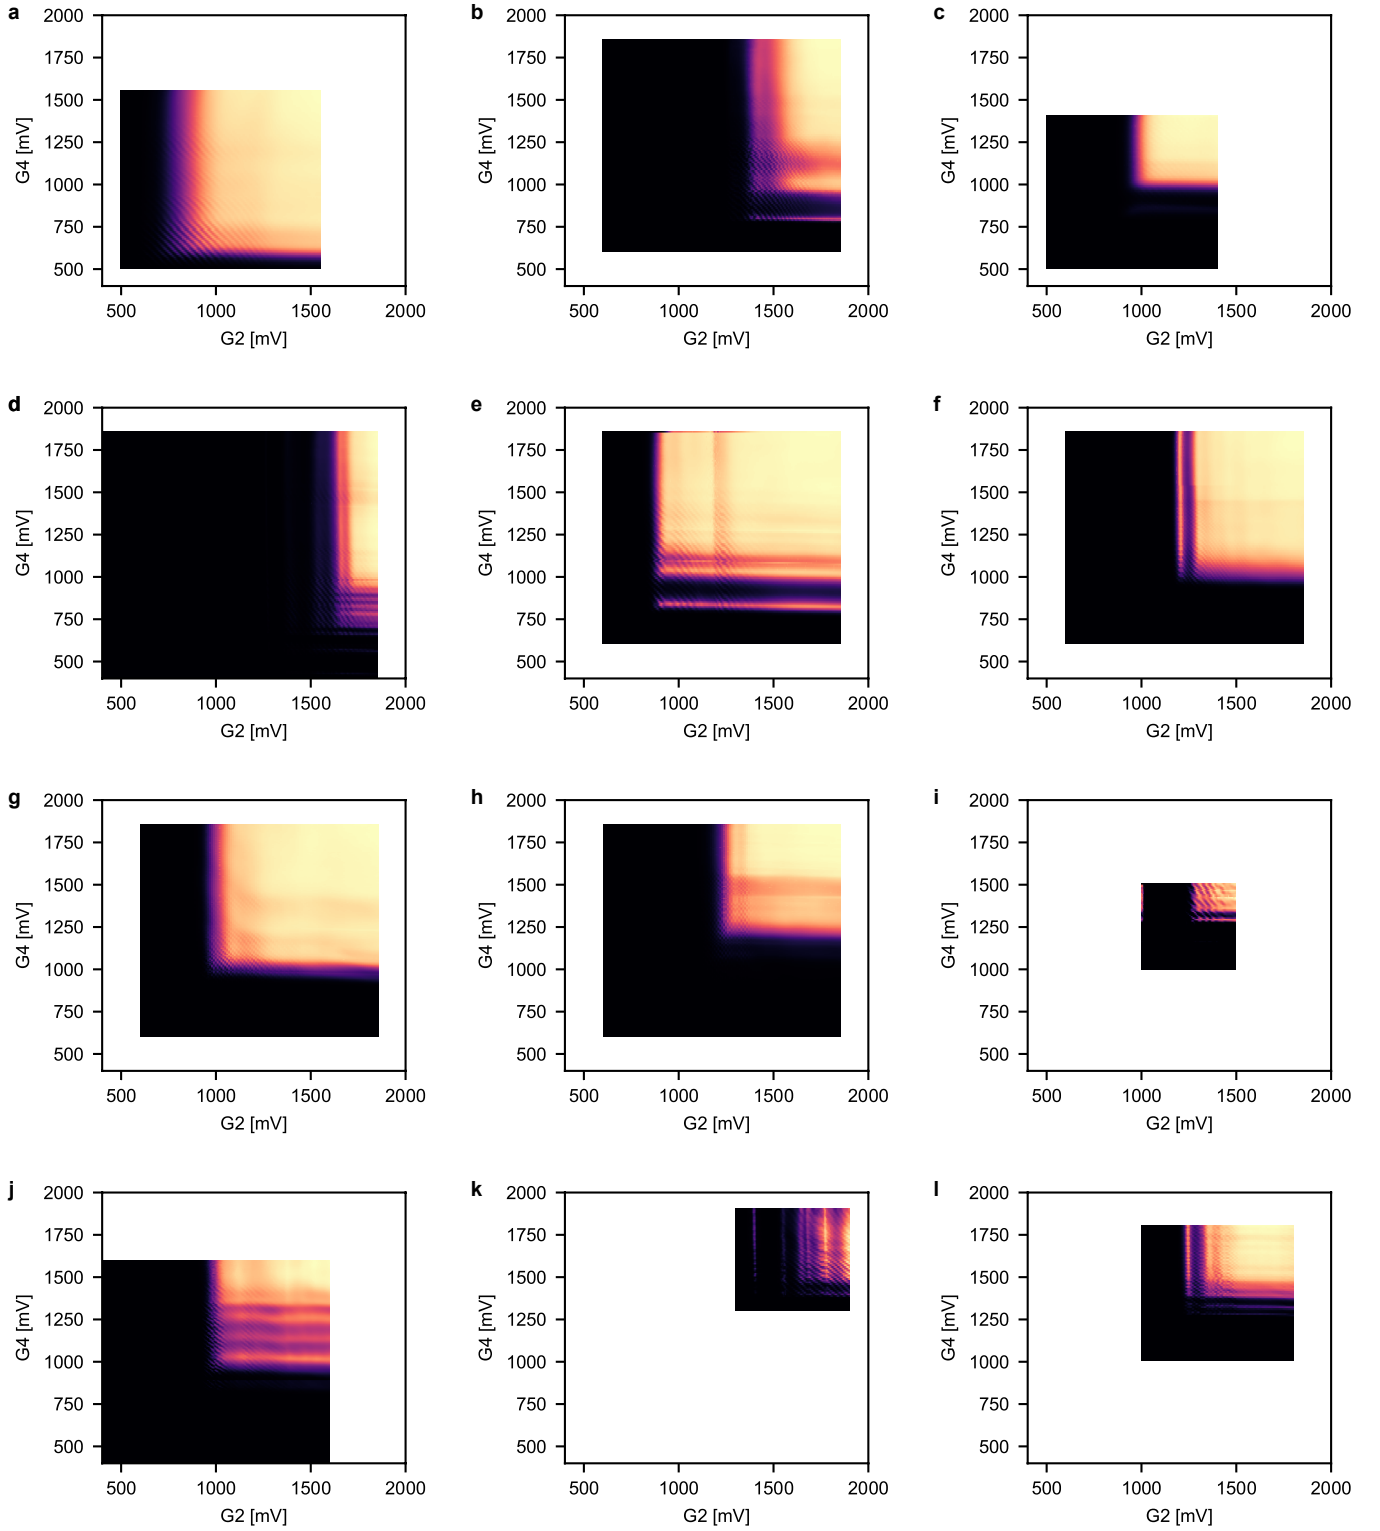

SUPPLEMENTARY FIG. 11. **Barrier-barrier maps for gates  $G2$ - $G4$ .** Barrier-barrier maps for a quantum dot under gate  $G3$  for 12 different samples, taken from yielding devices across wafers 11 (a-c), 12 (d-f), 13 (g-i) and 14 (j-l). For each sample, we are able to form a quantum dot.

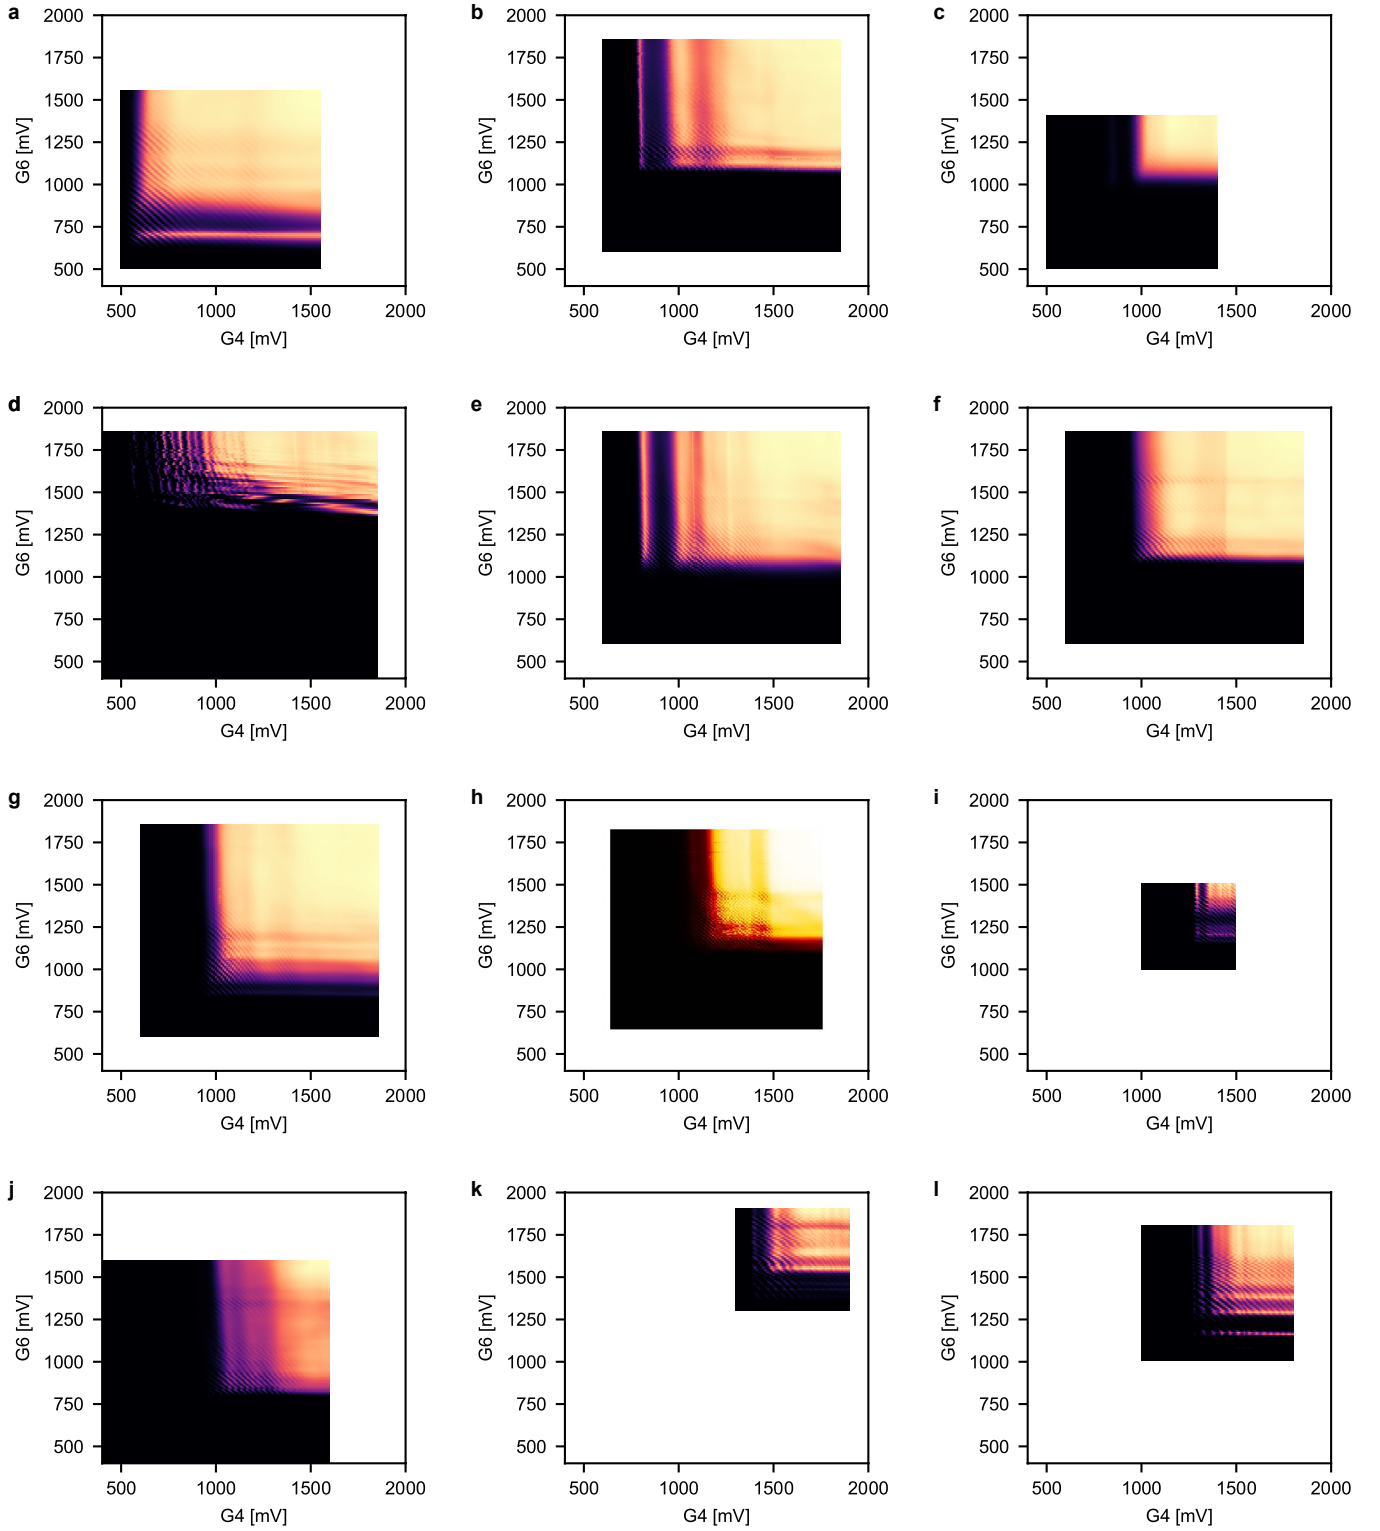

SUPPLEMENTARY FIG. 12. **Barrier-barrier maps for gates  $G4$ - $G6$ .** Barrier-barrier maps for a quantum dot under gate  $G5$  for 12 different samples, taken from yielding devices across wafers 11 (**a-c**), 12 (**d-f**), 13 (**g-i**) and 14 (**j-l**). For each sample, we are able to form a quantum dot. For the dot in **h**, the data was not stored properly, so the figure is reproduced from a screenshot.

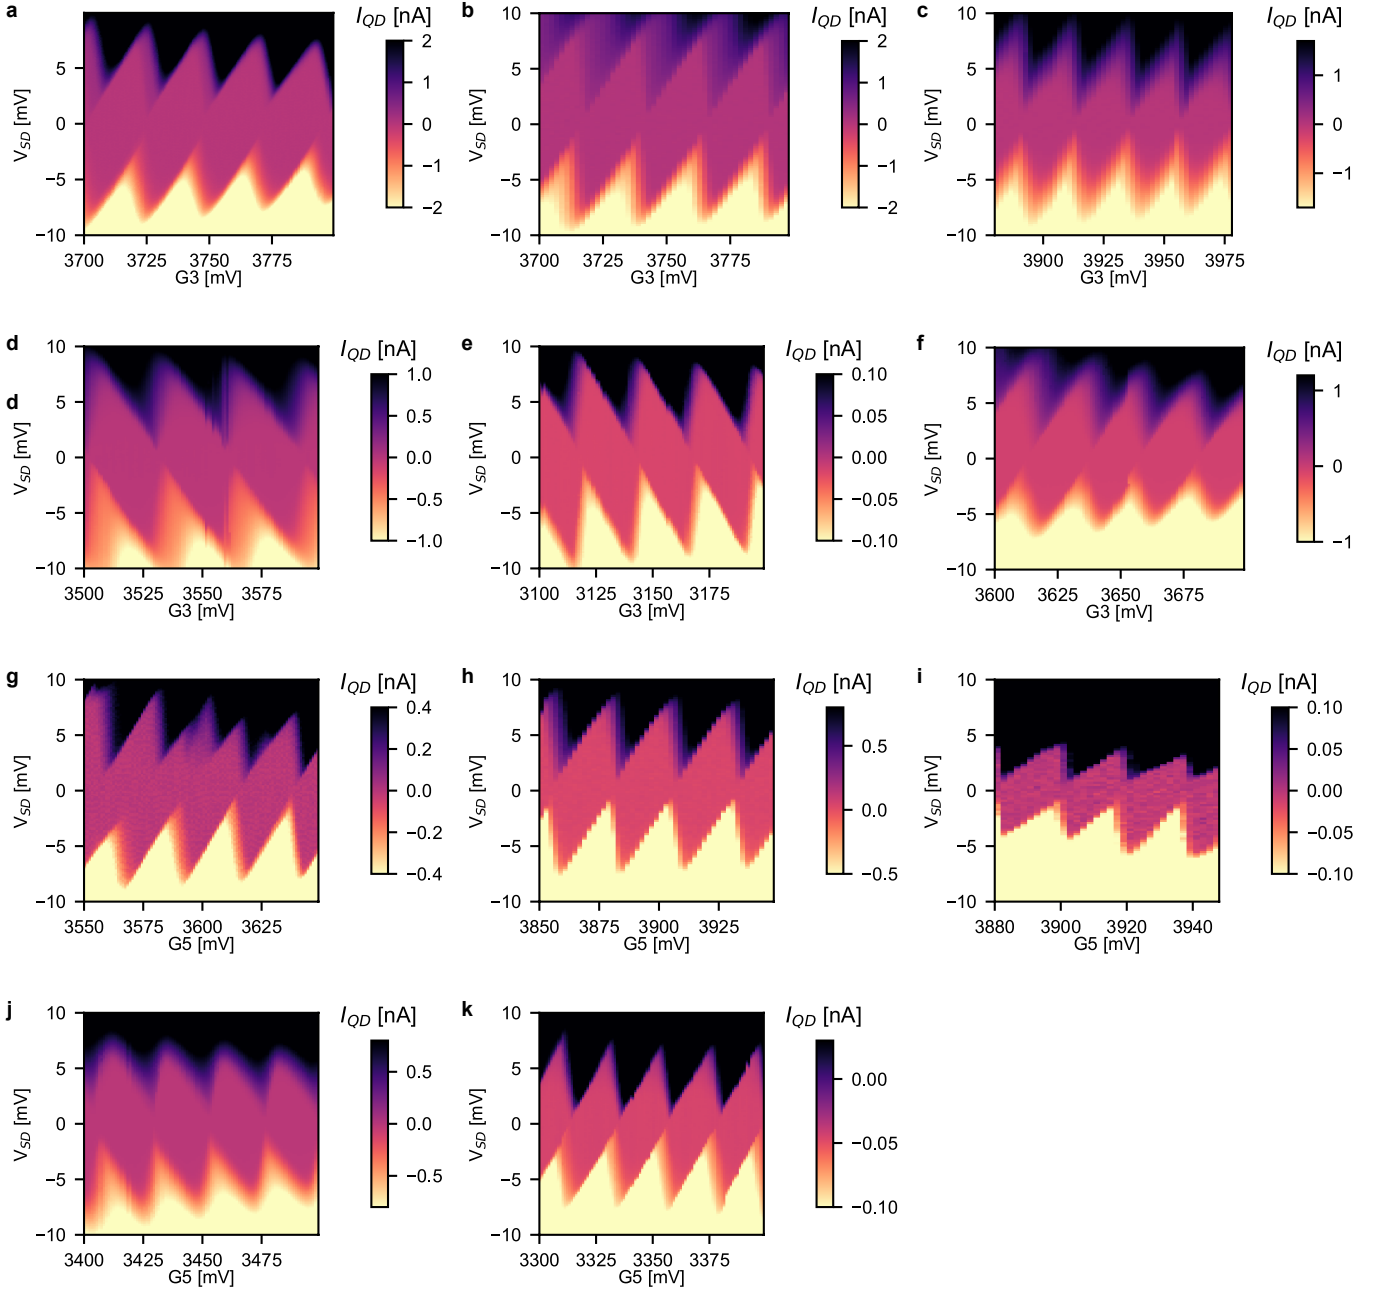

SUPPLEMENTARY FIG. 13. **Coulomb diamonds.** Typical Coulomb blockade diamonds measured in the multi-electron regime, taken on four different samples from the same wafer for dots under gate G3 (a-f) and under gate G5 (g-k). The dot in the main text, is the dot in i. From these diamonds, the quantum dot charging energy and the gate lever arms are determined. Coulomb diamonds are measured by scanning a gate voltage versus the bias voltage applied between the source and the drain contact. When the electrochemical potential of the quantum dot falls outside the bias window, the current through the quantum dot is blocked, i.e. the sample is in Coulomb blockade. Once the electrochemical potential of the quantum dot is aligned within the bias window, Coulomb blockade is lifted. The bias window increases along the vertical axis, hence Coulomb blockade is lifted over a wider gate voltage range. The regions of blocked current have the characteristic diamond shape. Here, we extract an average charging energy of  $8.9 \pm 0.1$  meV (lever arm:  $0.37 \pm 0.02$  meV/mV) for the dot under G3 (a, c, e, g, i, k) and an average charging energy of  $8.0 \pm 1.4$  meV for the dot under G5 (b, d, f, h, j). The larger standard deviation in the charging energy of the dot under G5 is mainly caused by the charging energy of the dot in f being 5.2 meV, as opposed to the other dots being between 8.7 and 9.0 meV. The average lever arm for G5 dot is  $0.36 \pm 0.1$  meV/mV.



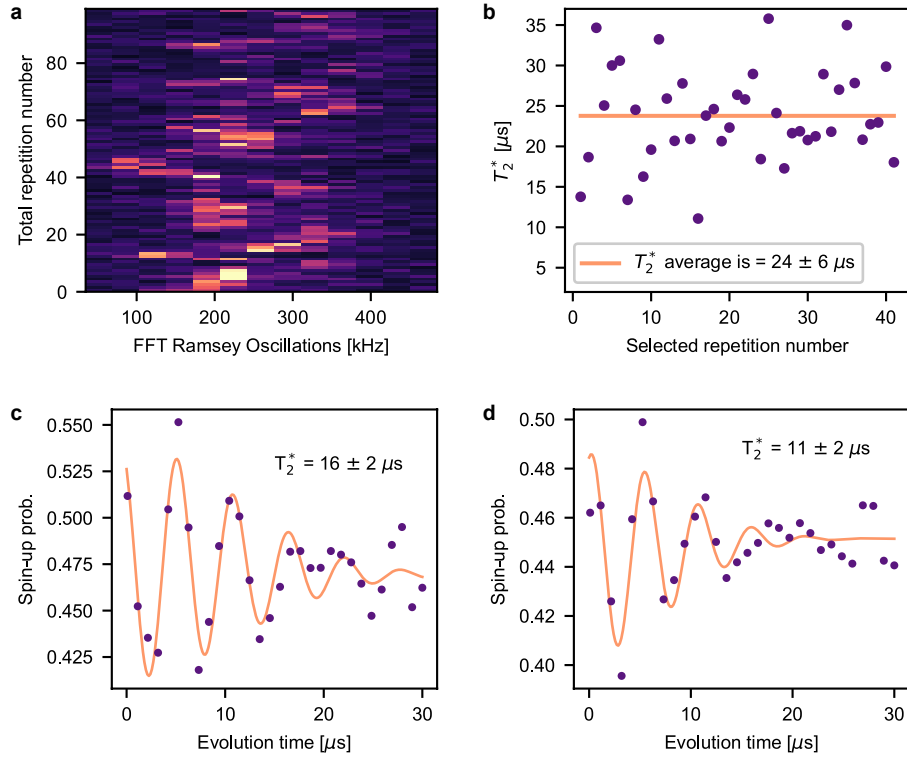

SUPPLEMENTARY FIG. 14. **Ramsey analysis over time.** **a**, Fast Fourier transform (FFT) of a Ramsey experiment. The data consists of 100 traces, each trace is an average of 200 repetitions. The entire measurement takes three hours in total. The FFT of the Ramsey fringes shows frequency jumps over the timescale of the measurement. Each trace is fitted individually with a decaying Gaussian curve and the fit is analysed by calculating the mean square error. We keep the 41 traces with mean square error below a given threshold. **b**, Extracted  $T_2^*$  for the selected traces (purple dots). The average of the  $T_2^*$  times of the selected traces is  $24 \pm 6 \mu\text{s}$  (orange line). **c**, Ramsey decay curve. The data points are the averaged data of the 41 selected traces. The fit gives a  $T_2^*$  time of  $16 \pm 2 \mu\text{s}$ . **d**, Ramsey decay curve. The data points are the average of all 100 traces of the two hour and 40 minute measurement. The fit gives a  $T_2^*$  time of  $11 \pm 2 \mu\text{s}$ .



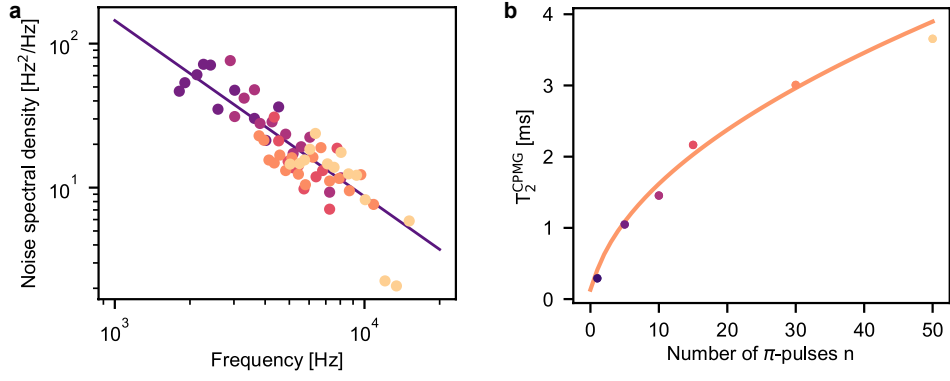

SUPPLEMENTARY FIG. 16. **Noise analysis for qubit 1.** **a**, Dynamical decoupling pulses for which the time between two subsequent  $\pi$ -pulses is fixed, can act as a filter function for Gaussian noise [4, 5]. The filter function peaks at a frequency of  $f_0 = \frac{n}{2t_{wait}}$ , with  $n$  the number of  $\pi$ -pulses and  $t_{wait}$  the evolution time. When the filter is sufficiently narrow around the frequency  $f_0$ , the noise within the bandwidth can be regarded as constant. We can use this to relate the amplitude of the CPMG decay,  $A_{CPMG}$ , for each wait time and number of  $\pi$  pulses, to the dominant noise spectrum for the qubit:  $S(f_0) = -\ln(A_{CPMG})/2\pi^2 t_{wait}$  [6, 7]. Here, we plot the noise spectrum,  $S(f)$  as a function of frequency for the data shown in Fig. 4c of the main text. We only take data points into account for which  $0.15 < A_{CPMG} < 0.85$ . We assume that the noise spectrum dominating spin decoherence is described by a power law and use the fit function  $Bf^{-\gamma}$ . We obtain  $\gamma = 1.2 \pm 0.1$  and a noise value at 1 Hz of  $B = 820 \pm 750 \text{ Hz}/\sqrt{\text{Hz}}$ . This agrees well with the fitting of the individual CPMG curves and the  $T_{2,CPMG}$  scaling in Fig. 4 of the main text. Using the susceptibility of the qubit resonance frequency to a voltage change of a nearby gate and the energy lever arm of that gate we can compare the noise value  $B$  to charge noise. With this conversion we obtain  $B = 29 \pm 27 \mu\text{eV}/\sqrt{\text{Hz}}$ . **b**, Following [4], we now use the filter function as described in **a** to estimate the noise decay and the noise level at 1 Hz that gives the given  $T_{2,CPMG}$  for the number of  $\pi$ -pulses and fit this to our data. We obtain  $\gamma = 1.06 \pm 0.13$  and  $B = 30 \pm 18 \mu\text{eV}/\sqrt{\text{Hz}}$ . This is comparable to the results obtained in **a**.

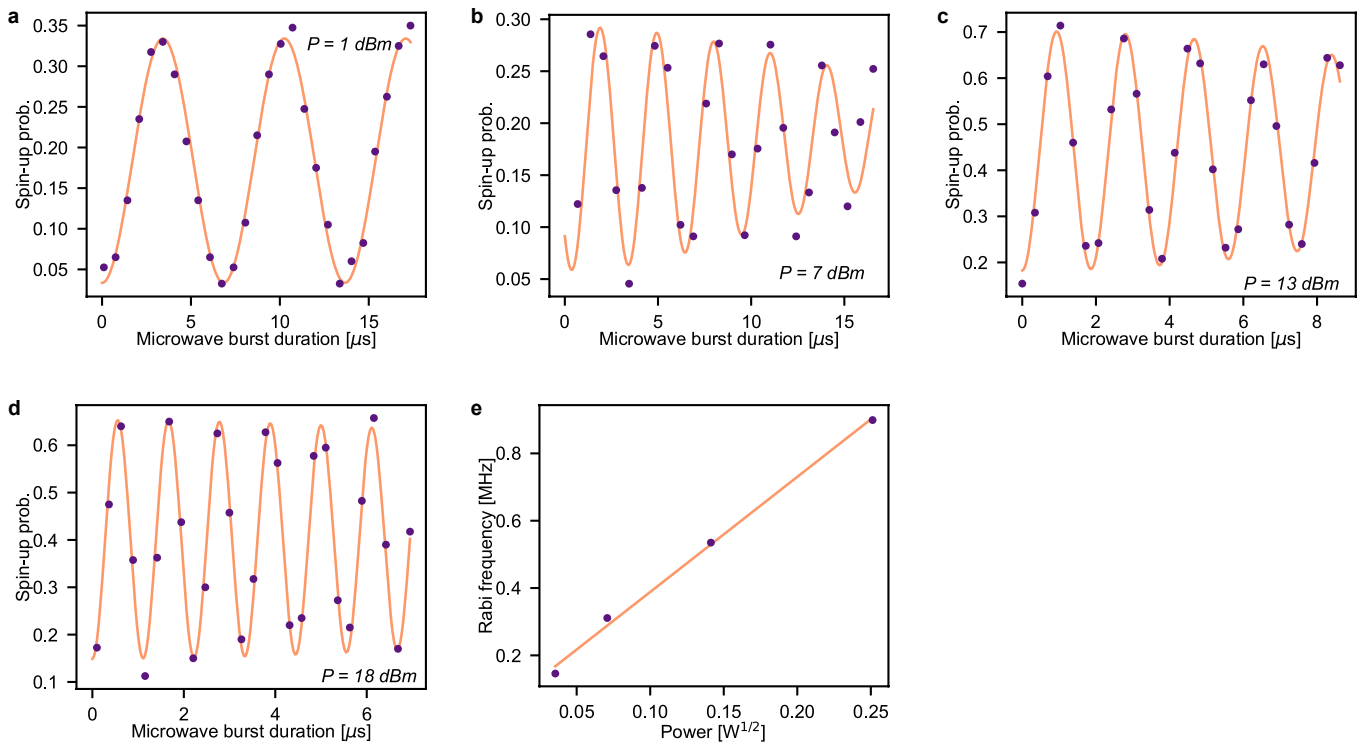

SUPPLEMENTARY FIG. 17. **Rabi oscillations for qubit 2.** **a-d**, Rabi oscillation of qubit 2 measured for different output powers of the microwave source. **e**, The extracted Rabi frequency is plotted versus the square root of the applied power, showing the expected linear dependence.

TABLE I. **Qubit metrics for single qubits in silicon.** The results obtained in this study compared to qubit performance in silicon of recent works. Data are either extracted from the publications directly, or by analysing the figures published in the work. The table respectively lists  $T_1$  with the relevant magnetic field,  $T_2^*$  with the relevant integration time,  $T_{2,Hahn}$ ,  $T_{2,CPMG}$ , the time it takes to do a  $\pi$ -rotation ( $T_\pi$ ) and the single-qubit gate fidelity.

| Paper                            |           | $T_1$ (B-field) [ms] | $T_2^*$ [us] (int time) | $T_{2,Hahn}$ [us] | $T_{2,CPMG}$ ( $\pi$ ) [us] | $T_\pi$ [us] | $F_{1Qgate}$ [%] | Substrate                            | Drive       |
|----------------------------------|-----------|----------------------|-------------------------|-------------------|-----------------------------|--------------|------------------|--------------------------------------|-------------|
| Zwerver et al. (2021)            | Q1        | 1600 (1)             | 24(100s)                | 292               | 3700 (50)                   | 0.9          | 99.0             | $^{28}\text{Si}$ MOS                 | ESR         |
|                                  | Q2        | -                    | -                       | 140               | 1200 (20)                   | -            | 99.1             | $^{28}\text{Si}$ MOS                 | ESR         |
| Veldhorst et al. (2014) [8, 9]   | Q1        | -                    | 120                     | 1200              | 28000 (500)                 | 1.6          | 99.6             | $^{28}\text{Si}$ MOS                 | ESR         |
| Chan et al. (2020) [9]           | Q2        | -                    | 61                      | -                 | -                           | -            | -                | $^{28}\text{Si}$ MOS                 | ESR         |
|                                  | Q3        | -                    | 30                      | -                 | -                           | -            | -                | $^{28}\text{Si}$ MOS                 | ESR         |
| Yang et al. (2019) [10]          |           | $\sim 1000$          | 33                      | 400               | 6700 (122) [11]             | -            | 99.9             | $^{28}\text{Si}$ MOS                 | ESR         |
| Huang et al. (2019) [12]         | Q1        | -                    | 24.3                    | 290               | -                           | 1            | 99.3             | $^{28}\text{Si}$ MOS                 | ESR         |
|                                  | Q2        | -                    | 10.5                    | 33.5              | -                           | -            | 99.4             | $^{28}\text{Si}$ MOS                 | ESR         |
| Yang et al. (2020) [13]          | Q1        | $\sim 500$           | 12.3                    | 200               | -                           | $\sim 0.9$   | 99.76            | $^{28}\text{Si}$ MOS                 | EDSR        |
| Petit et al. (2020a) [14]        | Q1        | -                    | 2.1                     | -                 | -                           | 0.45         | 98.7             | $^{28}\text{Si}$ MOS                 | ESR         |
|                                  | Q2        | -                    | 2.7                     | -                 | -                           | 0.45         | 99.3             | $^{28}\text{Si}$ MOS                 | ESR         |
| Petit et al. (2020b) [15]        | Q1        | -                    | 2.3                     | -                 | 63 (15)                     | -            | -                | $^{28}\text{Si}$ MOS                 | ESR         |
| <i>Measured above 1 K</i>        | Q2        | -                    | 2.9                     | -                 | 44 (15)                     | -            | -                | $^{28}\text{Si}$ MOS                 | ESR         |
| Yang et al. (2013) [16]          |           | 2600 (1.25)          | -                       | -                 | -                           | -            | -                | $^{\text{Nat}}\text{Si}$ MOS         | -           |
| Ciriano-Tejel et al. (2021) [17] | D1        | 280 (1)              | -                       | -                 | -                           | -            | -                | $^{28}\text{Si}$ MOS                 | -           |
|                                  | D2        | 9000 (1)             | -                       | -                 | -                           | -            | -                | $^{28}\text{Si}$ MOS                 | -           |
| Petit et al. (2018) [18]         |           | 145                  | -                       | -                 | -                           | -            | -                | $^{28}\text{Si}$ MOS                 | -           |
| Maurand et al (2016) [19]        |           | $> 0.175$            | 0.06 (2s)               | 0.245             | -                           | $\sim 0.01$  | -                | $^{\text{Nat}}\text{Si}$ MOS         | -           |
| Xue et al. (2021) [20]           | Q1        | 100.6 (0.43)         | 21.64                   | -                 | -                           | -            | -                | $^{28}\text{Si}/\text{SiGe}$         | EDSR        |
|                                  | Q2        | 95.0 (0.43)          | 10.08                   | -                 | -                           | -            | -                | $^{28}\text{Si}/\text{SiGe}$         | EDSR        |
| Struck et al. (2020) [21]        | Q1        | -                    | 21                      | -                 | 128                         | -            | -                | $^{28}\text{Si}/\text{SiGe}$         | EDSR        |
| Yoneda et al. (2019) [7]         |           | $> 100$              | 20                      | 99                | 3100 (2400)                 | 0.12         | 99.9             | $^{28}\text{Si}/\text{SiGe}$         | EDSR        |
| Sigillito et al. (2019) [22]     | Q1        | -                    | 2.6                     | 41                | -                           | -            | -                | $^{28}\text{Si}/\text{SiGe}$         | EDSR        |
|                                  | Q2        | -                    | 1.5                     | 31                | -                           | -            | -                | $^{28}\text{Si}/\text{SiGe}$         | EDSR        |
|                                  | Q3        | -                    | 10.4                    | 72                | -                           | -            | -                | $^{28}\text{Si}/\text{SiGe}$         | EDSR        |
|                                  | Q4        | 52                   | 9.4                     | 109               | -                           | -            | -                | $^{28}\text{Si}/\text{SiGe}$         | EDSR        |
| Takeda et al. (2020) [23]        | Q1        | 4.3                  | 1.82                    | 28.1              | -                           | 0.1          | 99.43            | $^{28}\text{Si}/\text{SiGe}$         | EDSR        |
|                                  | Q2        | 2.67                 | 1.69                    | 20.5              | -                           | 0.1          | 99.57            | $^{28}\text{Si}/\text{SiGe}$         | EDSR        |
|                                  | Q3        | 1.31                 | 1.69                    | 45.8              | -                           | 0.1          | 99.91            | $^{28}\text{Si}/\text{SiGe}$         | EDSR        |
| Zajac et al. (2018) [24]         | Q1        | 22                   | 1.4                     | 80                | -                           | 0.11         | 99.7             | $^{\text{Nat}}\text{Si}/\text{SiGe}$ | EDSR        |
|                                  | Q2        | -                    | 1.2                     | 22                | -                           | $\sim 0.1$   | 99.3             | $^{\text{Nat}}\text{Si}/\text{SiGe}$ | EDSR        |
| Watson et al. (2018) [25]        | Q1        | $> 50$               | 1                       | 19                | -                           | 0.25         | 99.3             | $^{\text{Nat}}\text{Si}/\text{SiGe}$ | EDSR        |
|                                  | Q2        | 3.7                  | 0.6                     | 7                 | -                           | 0.25         | 98.9             | $^{\text{Nat}}\text{Si}/\text{SiGe}$ | EDSR        |
| Kawakami et al. (2016) [6]       |           | -                    | 0.37                    | 70                | 400                         | 0.37         | 98.99            | $^{\text{Nat}}\text{Si}/\text{SiGe}$ | EDSR        |
| Borjans et al. (2018) [26]       | D1, dot 1 | 65 (0.2)             | -                       | -                 | -                           | -            | -                | $^{\text{Nat}}\text{Si}/\text{SiGe}$ | Micromagnet |
|                                  | D1, dot 2 | 160 (0.2)            | -                       | -                 | -                           | -            | -                | $^{\text{Nat}}\text{Si}/\text{SiGe}$ | Micromagnet |
|                                  | D2, dot 2 | 5000 (0.4)           | -                       | -                 | -                           | -            | -                | $^{\text{Nat}}\text{Si}/\text{SiGe}$ | -           |
|                                  | D2, dot 3 | $\sim 500$ (1)       | -                       | -                 | -                           | -            | -                | $^{\text{Nat}}\text{Si}/\text{SiGe}$ | -           |
|                                  | D2, dot 5 | $\sim 500$ (1)       | -                       | -                 | -                           | -            | -                | $^{\text{Nat}}\text{Si}/\text{SiGe}$ | -           |
|                                  | D2, dot 6 | $\sim 2000$ (1)      | -                       | -                 | -                           | -            | -                | $^{\text{Nat}}\text{Si}/\text{SiGe}$ | -           |
| Simmons et al. (2011) [27]       |           | 2800 (1.85)          | -                       | -                 | -                           | -            | -                | $^{\text{Nat}}\text{Si}/\text{SiGe}$ | -           |
| Hollmann et al. (2020) [28]      |           | $\sim 1000$ (1)      | -                       | -                 | -                           | -            | -                | $^{28}\text{Si}/\text{SiGe}$         | Nanomagnet  |

- 
- [1] Reed, M. *Entanglement and Quantum Error Correction with Superconducting Qubits* (2013).
- [2] Knill, E. *et al.* Randomized benchmarking of quantum gates. *Phys. Rev. A* **77**, 012307 (2008).
- [3] Magesan, E., Gambetta, J. M. & Emerson, J. Characterizing quantum gates via randomized benchmarking. *Phys. Rev. A* **85**, 042311 (2012).
- [4] Bylander, J. *et al.* Noise spectroscopy through dynamical decoupling with a superconducting flux qubit. *Nat. Phys.* **7**, 565–570 (2011).
- [5] Cywinski, L., Lutchyn, R. M., Nave, C. P. & Das Sarma, S. How to enhance dephasing time in superconducting qubits. *Phys. Rev. B* **77**, 11 (2008).
- [6] Kawakami, E. *et al.* Gate fidelity and coherence of an electron spin in an Si/SiGe quantum dot with micromagnet. *Proc. Natl. Acad. Sci. USA* **113**, 11738–11743 (2016).
- [7] Yoneda, J. *et al.* A quantum-dot spin qubit with coherence limited by charge noise and fidelity higher than 99.9%. *Nat. Nanotechnol.* **13**, 102–106 (2018).
- [8] Veldhorst, M. *et al.* An addressable quantum dot qubit with fault-tolerant control-fidelity. *Nat. Nanotechnol.* **9**, 981–985 (2014).
- [9] Chan, K. W. *et al.* Exchange coupling in a linear chain of three quantum-dot spin qubits in silicon. *Nano Lett.* **21** (2021).
- [10] Yang, C. H. *et al.* Silicon qubit fidelities approaching incoherent noise limits via pulse engineering. *Nat. Electron.* **2**, 151–158 (2019).
- [11] Struck, T. *et al.* Low-frequency spin qubit energy splitting noise in highly purified  $^{28}\text{Si}/\text{SiGe}$ . *npj Quant. Inf.* **6** (2020).
- [12] Huang, W. *et al.* Fidelity benchmarks for two-qubit gates in silicon. *Nature* **569**, 532–536 (2019).
- [13] Yang, C. H. *et al.* Operation of a silicon quantum processor unit cell above one kelvin. *Nature* **580**, 350–354 (2020).
- [14] Petit, L. *et al.* Universal quantum logic in hot silicon qubits. *Nature* **580**, 355–359 (2020).
- [15] Petit, L. *et al.* High-fidelity two-qubit gates in silicon above one Kelvin. *Preprint at arXiv:2007.09034* (2020).
- [16] Yang, C. H. *et al.* Spin-valley lifetimes in a silicon quantum dot with tunable valley splitting. *Nat. Commun.* **4**, 2069 (2013).
- [17] Ciriano-Tejeda, V. N. *et al.* Spin readout of a CMOS quantum dot by gate reflectometry and spin-dependent tunneling. *PRX Quantum* **2**, 010353 (2021).
- [18] Petit, L. *et al.* Spin lifetime and charge noise in hot silicon quantum dot qubits. *Phys. Rev. Lett.* **121**, 076801 (2018).
- [19] Maurand, R. *et al.* A CMOS silicon spin qubit. *Nat. Commun.* **7**, 13575 (2016).
- [20] Xue, X. *et al.* CMOS-based cryogenic control of silicon quantum circuits. *Nature* **593** (2021).
- [21] Chan, K. W. *et al.* Assessment of a silicon quantum dot spin qubit environment via noise spectroscopy. *Phys. Rev. Applied* **10**, 044017 (2018).
- [22] Sigillito, A. *et al.* Site-selective quantum control in an isotopically enriched  $^{28}\text{Si}/\text{Si}_{0.7}\text{Ge}_{0.3}$  quadruple quantum dot. *Phys. Rev. Applied* **11**, 061006 (2019). URL <https://link.aps.org/doi/10.1103/PhysRevApplied.11.061006>.
- [23] Takeda, K. *et al.* Quantum tomography of an entangled three-spin state in silicon. *Nat. Nanotechnol.* (2021).
- [24] Zajac, D. M. *et al.* Resonantly driven CNOT gate for electron spins. *Science* **359**, 439–442 (2018).
- [25] Watson, T. F. *et al.* A programmable two-qubit quantum processor in silicon. *Nature* **555**, 633–637 (2018).
- [26] Borjans, F., Zajac, D., Hazard, T. & Petta, J. Single-spin relaxation in a synthetic spin-orbit field. *Phys. Rev. Applied* **11**, 044063 (2019). URL <https://link.aps.org/doi/10.1103/PhysRevApplied.11.044063>.
- [27] Simmons, C. B. *et al.* Tunable Spin Loading and T<sub>1</sub> of a Silicon Spin Qubit Measured by Single-Shot Readout. *Phys. Rev. Lett.* **106** (2011).
- [28] Hollmann, A. *et al.* Large, tunable valley splitting and single-spin relaxation mechanisms in a  $\text{Si}/\text{Si}_x\text{Ge}_{1-x}$  quantum dot. *Phys. Rev. Applied* **13**, 034068 (2020). URL <https://link.aps.org/doi/10.1103/PhysRevApplied.13.034068>.
